# Supplementary material
Source: PubMed Central journal article supplement (PMC4142070)
Supplement: NIHMS587998-supplement-Supp_Fig_S1-S3.pdf [file NIHMS587998-supplement-Supp_Fig_S1-S3.pdf]

# Supporting Information for “Influence of a Heptad Repeat Stutter on the pH-Dependent Conformational Behavior of the Central Coiled-Coil from Influenza Hemagglutinin HA2”

Chelsea D. Higgins, Vladimir N. Malahskovich, Steven C. Almo, and Jonathan R. Lai\*

Department of Biochemistry, Albert Einstein College of Medicine, 1300 Morris Park Avenue, Bronx, NY

10461

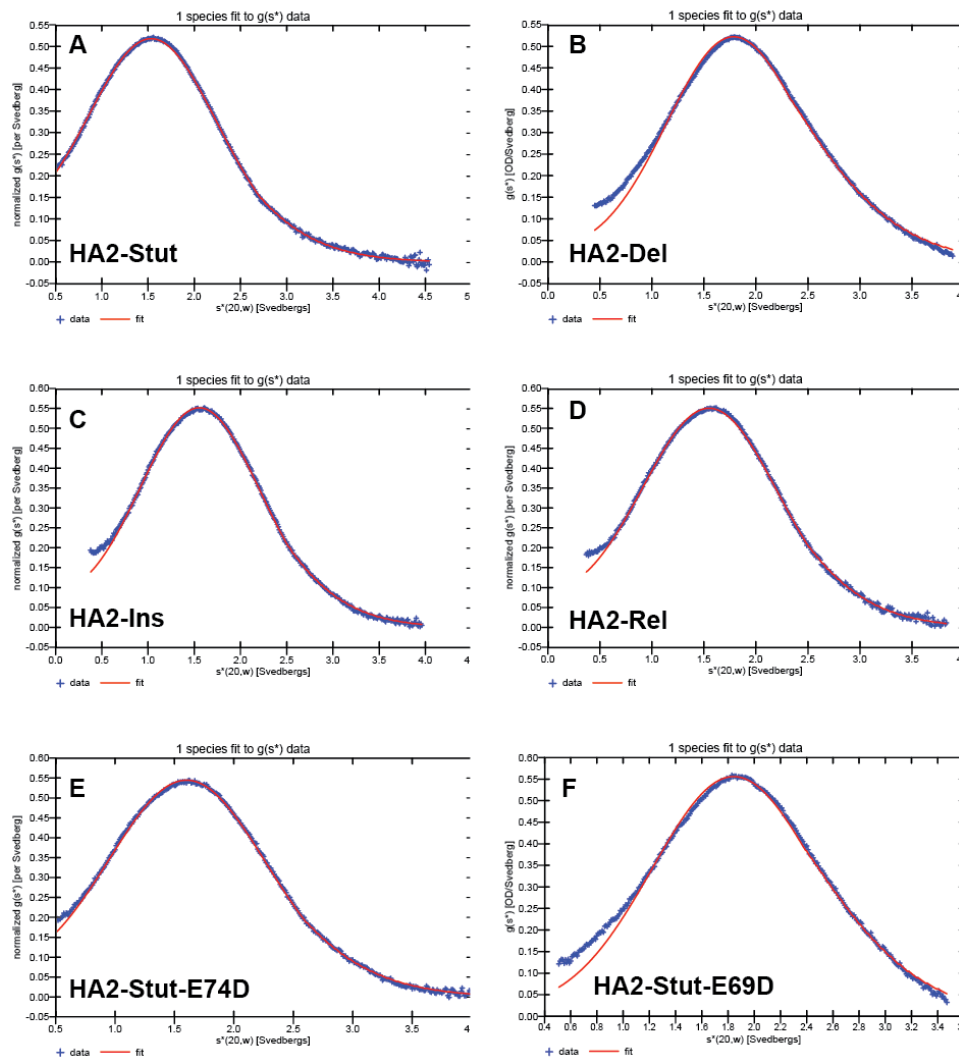

**Figure S1.** Velocity analytical ultracentrifugation of HA2-Stut (A), HA2-Del (B), HA2-Ins (C), HA2-Rel (D), HA2-Stut-E74D (E), and HA2-Stut-E69D (F). Molecular weight estimates are listed in the main text and in Table S1.

Table S1 – Results from sedimentation velocity analytical ultracentrifugation data analysis.

| Parameter                | HA2-Stut                  | HA2-Del                   | HA2-Ins                   | HA2-Rel                   |
|--------------------------|---------------------------|---------------------------|---------------------------|---------------------------|
| $C_o$ (OD)               | 0.9085<br>(0.9055-0.9116) | 0.7886<br>(0.7858-0.7912) | 0.8921<br>(0.8900-0.8941) | 0.8834<br>(0.8808-0.8860) |
| $s_{20,w}$ (S)           | 1.648<br>(1.645-1.650)    | 1.852<br>(1.850-1.854)    | 1.647<br>(1.646-1.649)    | 1.645<br>(1.643-1.647)    |
| $MW_{app}$<br>(s/D; kDa) | 14.34<br>(14.21-14.47)    | 17.42<br>(17.25-17.60)    | 14.79<br>(14.70-14.88)    | 14.38<br>(14.26-14.49)    |

| Parameter                | HA2-Stut-E74D             | HA2-Stut-E69D             |
|--------------------------|---------------------------|---------------------------|
| $C_o$ (OD)               | 0.8908<br>(0.8884-0.8930) | 0.7846<br>(0.7814-0.7876) |
| $s_{20,w}$ (S)           | 1.695<br>(1.693-1.697)    | 1.907<br>(1.905-1.910)    |
| $MW_{app}$<br>(s/D; kDa) | 15.18<br>(15.08-15.29)    | 17.44<br>(17.26-17.64)    |

<sup>a</sup>Values in parentheses indicate 68% confidence intervals from data fitting

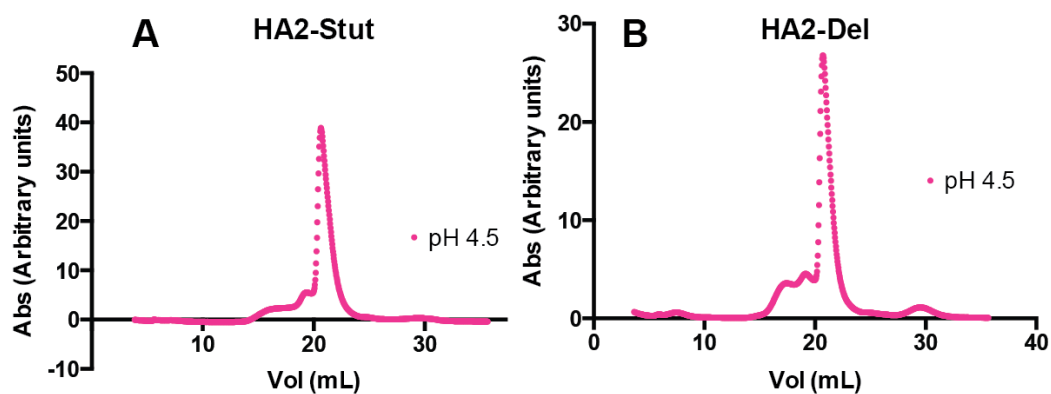

Figure S2. Gel filtration analysis of HA2-Stut (A) and HA2-Del (B).

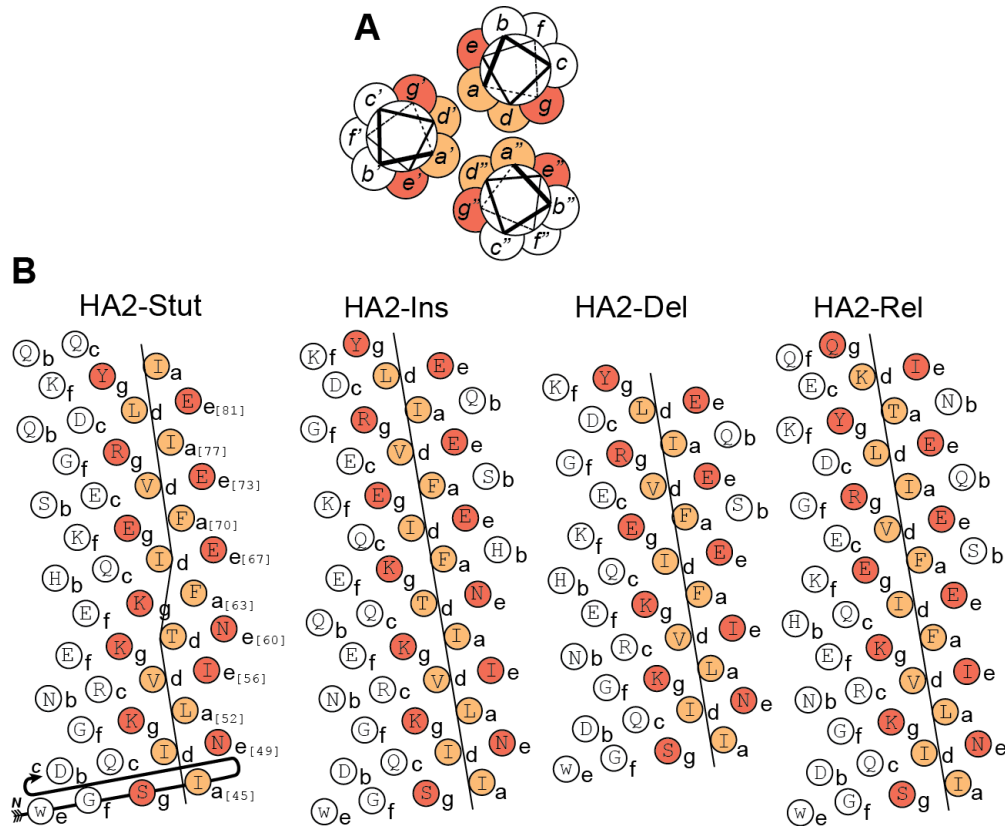

**Figure S3.** (A) Helical wheel diagram showing core (*a/d*) and flanking (*e/g*) interhelical interactions in a coiled-coil trimer. (B) Helical net analysis of HA2-Stut, HA2-Ins, HA2-Del, and HA2-Rel. Core *a/d* and flanking *e/g* residues colored as in panel A. Directionality of the polypeptide (N→C), and HA2 numbering shown on HA2-Stut.

## Materials and Methods:

### *Gel filtration analysis*

Analysis was performed on a Sephadex S75 column (10/300) at 4°C in 10 mM NaOAc pH 4.5 containing 100 mM NaCl. Protein samples were loaded at concentrations of 50–80  $\mu$ M and elution was monitored by absorbance at 280 nm. Both HA2-Stut and HA2-Del eluted as a single peak.

### *Analytical Ultracentrifugation*

Sedimentation velocity analysis was performed on a Beckman XL-1 analytical ultracentrifuge with a Ti60 rotor. Samples of StutExt and DelExt were loaded into double sectors cells at a protein concentration of 180  $\mu\text{M}$ , blanked against the sample buffer (10 mM sodium acetate, 100 mM NaCl, pH 4.5) in the reference sector. Two hundred scans were acquired at 58,000 rpm and 20 °C with sedimentation boundaries monitored by absorption at a wavelength of 280 nm. The sedimentation boundaries were directly fit as the derivative  $dc/dt$  using DCDT+ v2.4.0 to determine the sedimentation and diffusion coefficients,  $S$  and  $D$ , respectively from which was calculated the apparent molecular weight,  $M_{w,\text{app}}$  (refs. S1,S2). Sixty to 80 absorbance scans were globally analyzed for each experiment. The observed values were normalized to standard conditions of 20°C and water ( $s_{20,w}$  and  $D_{20,w}$ ) by correcting for buffer density and viscosity. Buffer density, viscosity, and  $\bar{v}$  were calculated using Sednterp (ref. S3).

- S1. Philo, J S. (2000). A method for directly fitting the time derivative of sedimentation velocity data and an alternative algorithm for calculating sedimentation coefficient distribution functions. *Analytical biochemistry*, 279(2), 151–63. doi:10.1006/abio.2000.4480
- S2. Philo, John S. (2006). Improved methods for fitting sedimentation coefficient distributions derived by time-derivative techniques. *Analytical biochemistry*, 354(2), 238–46. doi:10.1016/j.ab.2006.04.053
- S3. Hurton, T., Wright, A., Deubler, G., & Bashir, B. (2012). SEDNTERP. Biomolecular Interactions Technology Center (BITC), University of New Hampshire. Retrieved from <http://sednterp.unh.edu/>
